# Supplementary material
Source: PubMed Central journal article supplement (PMC6010158)
Supplement: NIHMS76745-supplement-Appendix.pdf [file NIHMS76745-supplement-Appendix.pdf]

**Appendix 1.** Summary of the cohorts included within consensus study and potential OA variables identified within each

| Cohort          | Self reported clinician diagnosed | Self perceived OA | TJR     | Knee x-ray | NHANES- type questions |   |   |   |   | WOMAC |
|-----------------|-----------------------------------|-------------------|---------|------------|------------------------|---|---|---|---|-------|
|                 |                                   |                   |         |            | 1                      | 2 | 3 | 4 | 5 |       |
| OAI             | ✓                                 |                   | ✓       | ✓          |                        | ✓ | ✓ |   |   | ✓     |
| MOST            | ✓                                 |                   | ✓       | ✓          | ✓                      | ✓ | ✓ | ✓ |   | ✓     |
| SOF             | ✓                                 |                   | ✓       | ✓          |                        |   |   |   | ✓ | ✓     |
| ROAD            |                                   |                   | ✓       | ✓          |                        |   | ✓ |   |   | ✓     |
| Herts           | ✓                                 |                   | ✓       | ✓          | ✓                      |   |   |   |   |       |
| Johnston County | ✓                                 |                   | ✓       | ✓          | ✓                      |   |   |   |   |       |
| TasOAC          | ✓                                 |                   | ✓       | ✓          |                        |   |   |   |   | ✓     |
| Chingford       | ✓                                 | ✓ (hip only)      | ✓ (hip) | ✓          | ✓                      | ✓ |   |   |   |       |
| Framingham      | ✓                                 |                   |         | ✓          |                        |   | ✓ |   |   |       |

**Appendix 2.** Wording variations of the binary NHANES-type pain questions found within the MILOS consortium cohorts

| <b>NHANES-Type Questions</b>                                                                              |
|-----------------------------------------------------------------------------------------------------------|
| “Pain, aching or stiffness in or around the knee most days” for at least 1 month of the past 12 months.   |
| “ [Any] Pain, aching, stiffness in (left/right)knee in past 12 months?”                                   |
| “Pain, aching, stiffness in (right/left) knee on most days for more than 1 month in the last 12 months?”  |
| “Pain, aching, stiffness on most days in the last month?”                                                 |
| NHANES I questionnaire “Have you ever had pain in or around your knee on most days for at least a month?” |
| “(Left/Right) Knee pain lasting at least a month during last 12 months”                                   |
| “Knee pain lasting at least one month in the current or previous year”                                    |
| “Number of months with knee pain for each year in the past 12 years since baseline visit”                 |
| “Have you had pain in or around your (left/right) knee on most days in the last month?”                   |
| “On most days do you have pain, aching or stiffness in your KNEES?”                                       |
| “Have you had pain on most days of the last month?”                                                       |
| “Have you ever had pain in your knees for more than one month?”                                           |
| “Have you had (any) knee pain within the last month?”                                                     |
| “Did you have [any] (knee/hip, R/L) pain in the last month?” “If yes, on how many days (0-5, 5-15, 15+)”  |
| “Ever pain lasting at least one month (in previous 2 years)”                                              |
